# Supplementary material for: The genomic landscape of invasive stratified mucin-producing carcinoma of the uterine cervix: the first description based on whole-exome sequencing
Source: Springer Nature journal article supplement (doi:10.1186/s12967-022-03368-w), 2022-04-25

**A***cophenetic metric*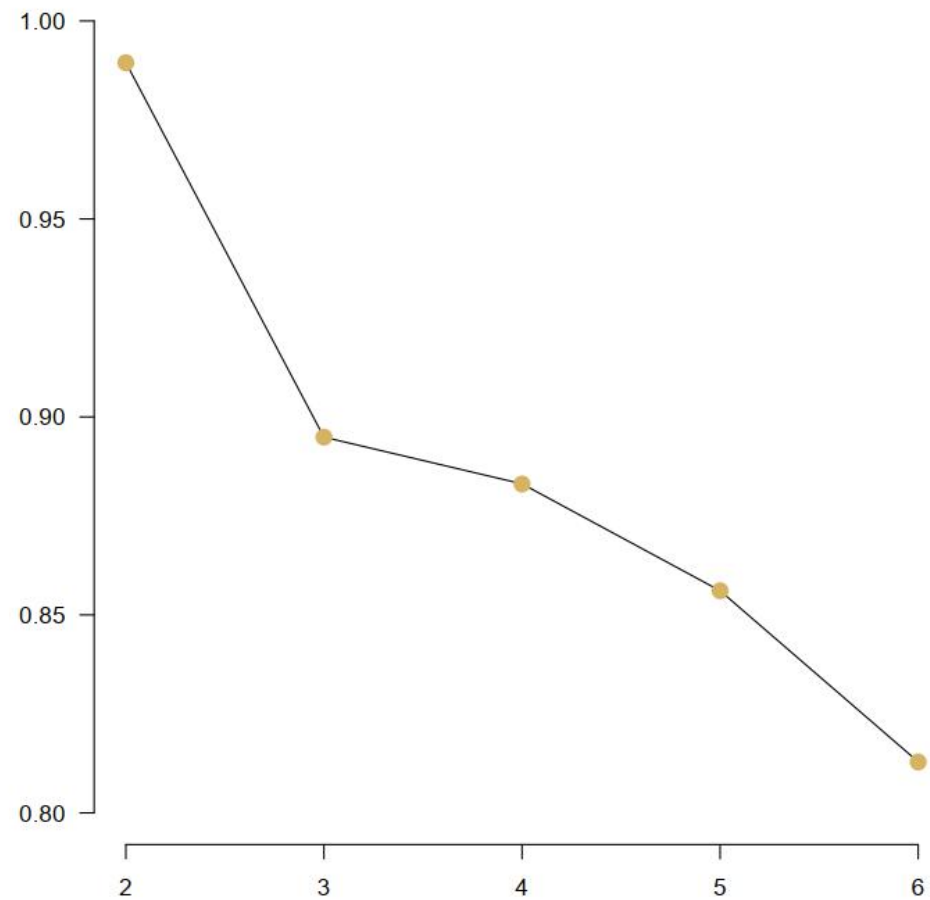**B**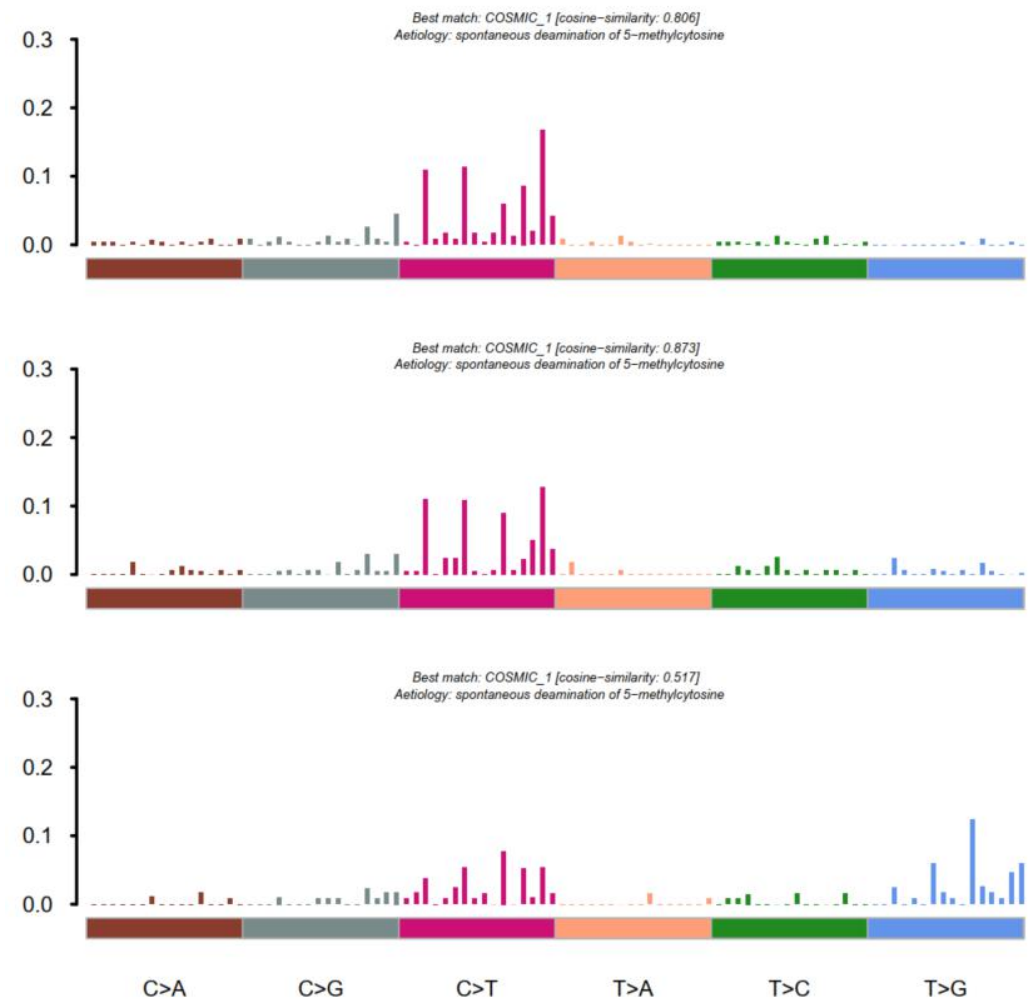

Supplement: MOESM2 [file 20341914]
